# Supplementary material
Source: PubMed Central journal article supplement (PMC10625161)
Supplement: NIHMS1571409-supplement-1.pdf [file NIHMS1571409-supplement-1.pdf]

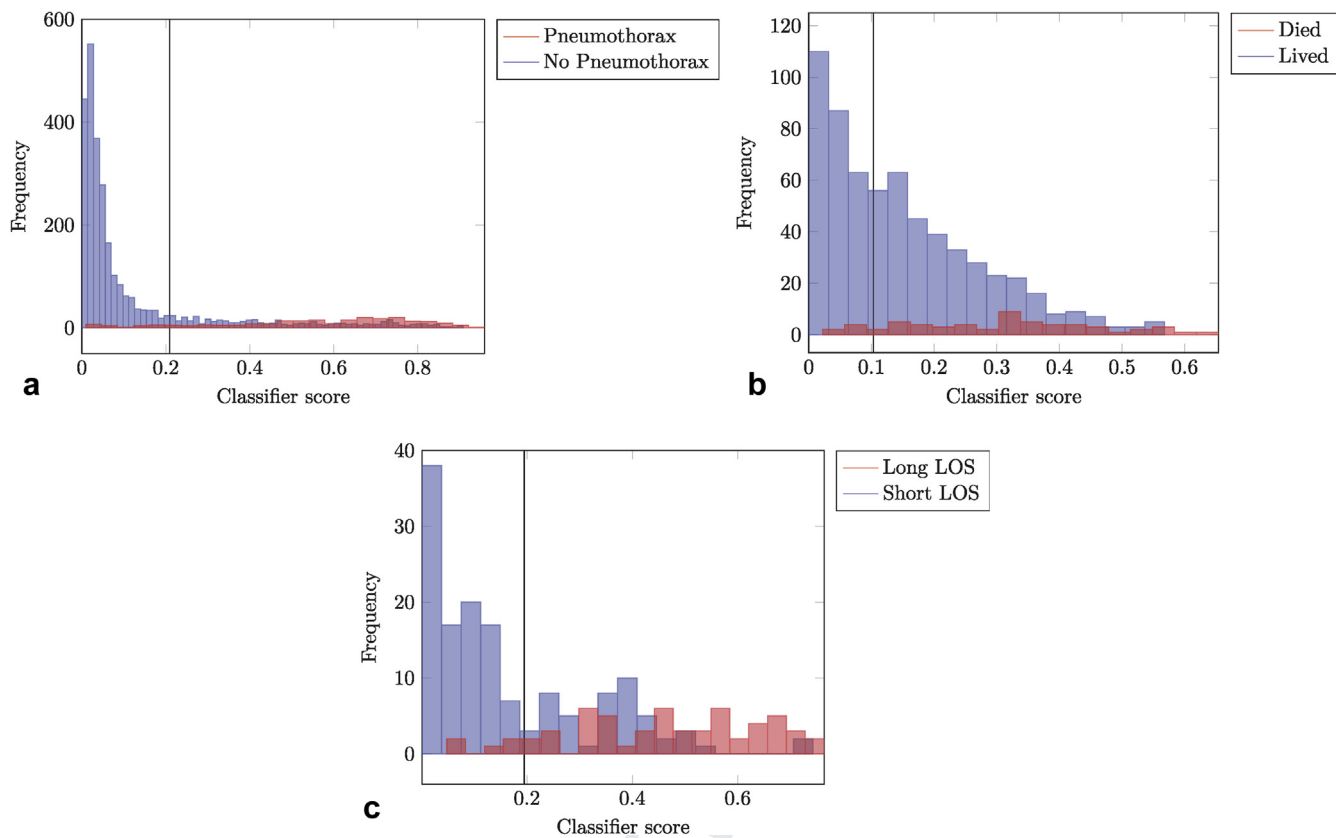

**Figure E1.** (a–c) Probability histograms. The positive class (class of interest) is plotted in red, and the negative class is plotted in blue. The vertical black line indicates the probability threshold corresponding to 90% sensitivity. (a) TTB probability histogram. (b) TIPS probability histogram. (c) UAE probability histogram.

**Table E1.** Features Used as Inputs into TTB Random Forest Model

|     |                                                          |
|-----|----------------------------------------------------------|
| 913 | Age at admission, y                                      |
| 914 | Admission day is on a weekend                            |
| 915 | Elective vs nonelective admission                        |
| 916 | Indicator of sex                                         |
| 917 | HCUP indicator of emergency department record            |
| 918 | Census Division of hospital (strata)                     |
| 919 | ICD-9-CM number of chronic conditions                    |
| 920 | Expected primary payer, uniform                          |
| 921 | Patient location: NCHS urban-rural code                  |
| 922 | Recorded BMI > 30                                        |
| 923 | Race                                                     |
| 924 | Service line based on ICD-9 codes                        |
| 925 | Indicator of transfer into the hospital                  |
| 926 | Median household income for patient's ZIP Code           |
| 927 | H/O Administrative/social admission                      |
| 928 | H/O Allergic reactions                                   |
| 929 | H/O Bacterial infection, unspecified site                |
| 930 | H/O Calculus of urinary tract                            |
| 931 | H/O Cancer of bladder                                    |
| 932 | H/O Cancer of brain and nervous system                   |
| 933 | H/O Cancer of breast                                     |
| 934 | H/O Cancer of bronchus, lung                             |
| 935 | H/O Cancer of cervix                                     |
| 936 | H/O Cancer of colon                                      |
| 937 | H/O Cancer of esophagus                                  |
| 938 | H/O Cancer of head and neck                              |
| 939 | H/O Cancer of kidney and renal pelvis                    |
| 940 | H/O Cancer of liver and intrahepatic bile duct           |
| 941 | H/O Cancer of other gastrointestinal organs, peritoneum  |
| 942 | H/O Cancer of other female genital organs                |
| 943 | H/O Cancer of other male genital organs                  |
| 944 | H/O Cancer of other urinary organs                       |
| 945 | H/O Cancer of ovary                                      |
| 946 | H/O Cancer of prostate                                   |
| 947 | H/O Cancer of rectum and anus                            |
| 948 | H/O Cancer of stomach                                    |
| 949 | H/O Cancer of testis                                     |
| 950 | H/O Cancer of thyroid                                    |
| 951 | H/O Cancer of uterus                                     |
| 952 | H/O Cancer, other and unspecified primary                |
| 953 | H/O Cancer, other respiratory and intrathoracic          |
| 954 | H/O Cardiac and circulatory congenital anomalies         |
| 955 | H/O Cataract                                             |
| 956 | H/O Chronic kidney disease                               |
| 957 | H/O Complications of surgical procedures or medical care |
| 958 | H/O Conduction disorders                                 |
| 959 | H/O Contraceptive and procreative management             |
| 960 | H/O Coronary atherosclerosis and other heart disease     |
| 961 | H/O Diabetes mellitus without complication               |
| 962 | H/O Fracture of neck of femur (hip)                      |
| 963 | H/O Fracture of upper limb                               |
| 964 | H/O Gastroduodenal ulcer (except hemorrhage)             |
| 965 | H/O Genitourinary symptoms and ill-defined conditions    |

*continued***Table E1.** Features Used as Inputs into TTB Random Forest Model (*continued*)

|      |                                                                                           |      |
|------|-------------------------------------------------------------------------------------------|------|
| 970  | H/O HIV infection                                                                         | 970  |
| 971  | H/O Heart valve disorders                                                                 | 971  |
| 972  | H/O Hodgkin disease                                                                       | 972  |
| 973  | H/O Immunizations and screening for infectious disease                                    | 973  |
| 974  | H/O Intracranial injury                                                                   | 974  |
| 975  | H/O Leukemias                                                                             | 975  |
| 976  | H/O Maintenance chemotherapy, radiotherapy                                                | 976  |
| 977  | H/O Medical examination/evaluation                                                        | 977  |
| 978  | H/O Melanomas of skin                                                                     | 978  |
| 979  | H/O Menopausal disorders                                                                  | 979  |
| 980  | H/O Miscellaneous mental health disorders                                                 | 980  |
| 981  | H/O Non-Hodgkin lymphoma                                                                  | 981  |
| 982  | H/O Osteoarthritis                                                                        | 982  |
| 983  | H/O Other CNS infection and poliomyelitis                                                 | 983  |
| 984  | H/O Other aftercare                                                                       | 984  |
| 985  | H/O Other and unspecified benign neoplasm                                                 | 985  |
| 986  | H/O Other circulatory disease                                                             | 986  |
| 987  | H/O Other congenital anomalies                                                            | 987  |
| 988  | H/O Other connective tissue disease                                                       | 988  |
| 989  | H/O Other ear and sense organ disorders                                                   | 989  |
| 990  | H/O Other eye disorders                                                                   | 990  |
| 991  | H/O Other female genital disorders                                                        | 991  |
| 992  | H/O Other fractures                                                                       | 992  |
| 993  | H/O Other gastrointestinal disorders                                                      | 993  |
| 994  | H/O Other hematologic conditions                                                          | 994  |
| 995  | H/O Other infections, including parasitic                                                 | 995  |
| 996  | H/O Other injuries and conditions due to external causes                                  | 996  |
| 997  | H/O Other liver diseases                                                                  | 997  |
| 998  | H/O Other lower respiratory disease                                                       | 998  |
| 999  | H/O Other nervous system disorders                                                        | 999  |
| 1000 | H/O Other nonepithelial cancer of skin                                                    | 1000 |
| 1001 | H/O Other nutritional, endocrine, and metabolic disorders                                 | 1001 |
| 1002 | H/O Other screening for suspected conditions (not mental disorders or infectious disease) | 1002 |
| 1003 | H/O Other upper respiratory disease                                                       | 1003 |
| 1004 | H/O Pathologic fracture                                                                   | 1004 |
| 1005 | H/O Phlebitis, thrombophlebitis, and thromboembolism                                      | 1005 |
| 1006 | H/O Rehabilitation care, fitting of prostheses, and adjustment of devices                 | 1006 |
| 1007 | H/O Residual codes, unclassified                                                          | 1007 |
| 1008 | H/O Respiratory failure, insufficiency, arrest (adult)                                    | 1008 |
| 1009 | H/O Screening and history of mental health and substance abuse codes                      | 1009 |
| 1010 | H/O Substance-related disorders                                                           | 1010 |
| 1011 | H/O Suicide and intentional self-inflicted injury                                         | 1011 |
| 1012 | H/O Tuberculosis                                                                          | 1012 |

BMI = body mass index; CNS = central nervous system; HCUP = Healthcare Cost and Utilization Project; HIV = human immunodeficiency virus; H/O = history of; ICD-9-CM = *International Classification of Diseases, 9th Revision, Clinical Modification*; NCHS = National Center for Health Statistics; TTB = transthoracic biopsy.

**Table E2.** Features Used as Inputs into TIPS Random Forest Model

|      |                                                         |
|------|---------------------------------------------------------|
| 1027 | Age at admission, y                                     |
| 1028 | Admission day is on a weekend                           |
| 1029 | Elective vs nonelective admission                       |
| 1030 | Indicator of sex                                        |
| 1031 | HCUP indicator of emergency department record           |
| 1032 | Census Division of hospital (strata)                    |
| 1033 | ICD-9-CM number of chronic conditions                   |
| 1034 | Expected primary payer, uniform                         |
| 1035 | Patient Location: NCHS urban-rural code                 |
| 1036 | Recorded BMI > 30                                       |
| 1037 | Race                                                    |
| 1038 | Service line based on ICD-9 codes                       |
| 1039 | Indicator of transfer into the hospital                 |
| 1040 | Median household income for patient's ZIP Code          |
| 1041 | H/O Administrative/social admission                     |
| 1042 | H/O Allergic reactions                                  |
| 1043 | H/O Bacterial infection, unspecified site               |
| 1044 | H/O Calculus of urinary tract                           |
| 1045 | H/O Cancer of bladder                                   |
| 1046 | H/O Cancer of breast                                    |
| 1047 | H/O Cancer of bronchus, lung                            |
| 1048 | H/O Cancer of cervix                                    |
| 1049 | H/O Cancer of colon                                     |
| 1050 | H/O Cancer of esophagus                                 |
| 1051 | H/O Cancer of head and neck                             |
| 1052 | H/O Cancer of kidney and renal pelvis                   |
| 1053 | H/O Cancer of liver and intrahepatic bile duct          |
| 1054 | H/O Cancer of other gastrointestinal organs, peritoneum |
| 1055 | H/O Cancer of other female genital organs               |
| 1056 | H/O Cancer of ovary                                     |
| 1057 | H/O Cancer of prostate                                  |
| 1058 | H/O Cancer of rectum and anus                           |
| 1059 | H/O Cancer of stomach                                   |
| 1060 | H/O Cancer of testis                                    |
| 1061 | H/O Cancer of thyroid                                   |
| 1062 | H/O Cancer of uterus                                    |
| 1063 | H/O Cancer, other and unspecified primary               |
| 1064 | H/O Cardiac and circulatory congenital anomalies        |
| 1065 | H/O Cataract                                            |
| 1066 | H/O Chronic kidney disease                              |
| 1067 | H/O Conduction disorders                                |
| 1068 | H/O Contraceptive and procreative management            |
| 1069 | H/O Coronary atherosclerosis and other heart disease    |
| 1070 | H/O Diabetes mellitus without complication              |
| 1071 | H/O Digestive congenital anomalies                      |
| 1072 | H/O Gastroduodenal ulcer (except hemorrhage)            |
| 1073 | H/O Genitourinary symptoms and ill-defined conditions   |
| 1074 | H/O HIV infection                                       |
| 1075 | H/O Heart valve disorders                               |
| 1076 | H/O Immunizations and screening for infectious disease  |
| 1077 | H/O Intracranial injury                                 |
| 1078 | H/O Leukemias                                           |
| 1079 | H/O Medical examination/evaluation                      |

*continued***Table E2.** Features Used as Inputs into TIPS Random Forest Model (*continued*)

|      |                                                                           |
|------|---------------------------------------------------------------------------|
| 1084 | H/O Melanomas of skin                                                     |
| 1085 | H/O Menopausal disorders                                                  |
| 1086 | H/O Non-Hodgkin lymphoma                                                  |
| 1087 | H/O Other CNS infection and poliomyelitis                                 |
| 1088 | H/O Other aftercare                                                       |
| 1089 | H/O Other and unspecified benign neoplasm                                 |
| 1090 | H/O Other circulatory disease                                             |
| 1091 | H/O Other congenital anomalies                                            |
| 1092 | H/O Other connective tissue disease                                       |
| 1093 | H/O Other eye disorders                                                   |
| 1094 | H/O Other fractures                                                       |
| 1095 | H/O Other gastrointestinal disorders                                      |
| 1096 | H/O Other infections, including parasitic                                 |
| 1097 | H/O Other injuries and conditions due to external causes                  |
| 1098 | H/O Other liver diseases                                                  |
| 1099 | H/O Other lower respiratory disease                                       |
| 1100 | H/O Other nervous system disorders                                        |
| 1101 | H/O Other nonepithelial cancer of skin                                    |
| 1102 | H/O Other nutritional, endocrine, and metabolic disorders                 |
| 1103 | H/O Other skin disorders                                                  |
| 1104 | H/O Other upper respiratory disease                                       |
| 1105 | H/O Phlebitis, thrombophlebitis, and thromboembolism                      |
| 1106 | H/O Rehabilitation care, fitting of prostheses, and adjustment of devices |
| 1107 | H/O Residual codes, unclassified                                          |
| 1108 | H/O Respiratory failure, insufficiency, arrest (adult)                    |
| 1109 | H/O Screening and history of mental health and substance abuse codes      |
| 1110 | H/O Substance-related disorders                                           |
| 1111 | H/O Suicide and intentional self-inflicted injury                         |
| 1112 | H/O Tuberculosis                                                          |

---

BMI = body mass index; CNS = central nervous system; HCUP = Healthcare Cost and Utilization Project; HIV = human immunodeficiency virus; H/O = history of; ICD-9-CM = *International Classification of Diseases, 9th Revision, Clinical Modification*; NCHS = National Center for Health Statistics; TIPS = transjugular intrahepatic portosystemic shunt.

1084  
1085  
1086  
1087  
1088  
1089  
1090  
1091  
1092  
1093  
1094  
1095  
1096  
1097  
1098  
1099  
1100  
1101  
1102  
1103  
1104  
1105  
1106  
1107  
1108  
1109  
1110  
1111  
1112  
1113  
1114  
1115  
1116  
1117  
1118  
1119  
1120  
1121  
1122  
1123  
1124  
1125  
1126  
1127  
1128  
1129  
1130  
1131  
1132  
1133  
1134  
1135  
1136  
1137  
1138  
1139  
1140

**Table E3.** Features Used as Inputs into UAE Random Forest Model

1141  
1142  
1143  
1144  
1145  
1146  
1147  
1148  
1149  
1150  
1151  
1152  
1153  
1154  
1155  
1156  
1157  
1158  
1159  
1160  
1161  
1162  
1163  
1164  
1165  
1166  
1167  
1168  
1169  
1170  
1171  
1172  
1173  
1174  
1175  
1176  
1177  
1178  
1179  
1180  
1181  
1182  
1183  
1184  
1185  
1186  
1187  
1188  
1189  
1190  
1191  
1192  
1193  
1194  
1195  
1196  
1197

- Age at admission, y
- Admission day is on a weekend
- Elective vs nonelective admission
- Indicator of sex
- HCUP indicator of emergency department record
- Census Division of hospital (strata)
- ICD-9-CM number of chronic conditions
- Expected primary payer, uniform
- Patient location: NCHS urban-rural code
- Recorded BMI > 30
- Race
- Service line based on ICD-9 codes
- Indicator of transfer into the hospital
- Median household income for patient's ZIP Code
- H/O Administrative/social admission
- H/O Allergic reactions
- H/O Calculus of urinary tract
- H/O Cancer of breast
- H/O Cancer of cervix
- H/O Cancer of colon
- H/O Cancer of kidney and renal pelvis
- H/O Cancer of rectum and anus
- H/O Cancer of thyroid
- H/O Cardiac and circulatory congenital anomalies
- H/O Chronic kidney disease
- H/O Conduction disorders
- H/O Contraceptive and procreative management
- H/O Coronary atherosclerosis and other heart disease
- H/O Genitourinary symptoms and ill-defined conditions
- H/O HIV infection
- H/O Heart valve disorders
- H/O Hodgkin disease
- H/O Immunizations and screening for infectious disease
- H/O Medical examination/evaluation
- H/O Melanomas of skin
- H/O Menopausal disorders
- H/O Other CNS infection and poliomyelitis
- H/O Other aftercare
- H/O Other and unspecified benign neoplasm
- H/O Other circulatory disease
- H/O Other complications of birth, puerperium affecting management of mother
- H/O Other complications of pregnancy
- H/O Other connective tissue disease
- H/O Other eye disorders
- H/O Other female genital disorders
- H/O Other gastrointestinal disorders
- H/O Other hematologic conditions
- H/O Other infections, including parasitic
- H/O Other injuries and conditions due to external causes
- H/O Other lower respiratory disease
- H/O Other nervous system disorders
- H/O Other nonepithelial cancer of skin

*continued*

**Table E3.** Features Used as Inputs into UAE Random Forest Model (*continued*)

1198  
1199  
1200  
1201  
1202  
1203  
1204  
1205  
1206  
1207  
1208

- H/O Other nutritional, endocrine, and metabolic disorders
- H/O Other pregnancy and delivery, including normal
- H/O Phlebitis, thrombophlebitis, and thromboembolism
- H/O Residual codes, unclassified
- H/O Respiratory failure, insufficiency, arrest (adult)
- H/O Screening and history of mental health and substance abuse codes
- H/O Substance-related disorders
- H/O Suicide and intentional self-inflicted injury

BMI = body mass index; CNS = central nervous system; HCUP = Healthcare Cost and Utilization Project; HIV = human immunodeficiency virus; H/O = history of; ICD-9-CM = *International Classification of Diseases, 9th Revision, Clinical Modification*; NCHS = National Center for Health Statistics; UAE = uterine artery embolization.

**Table E4.** Training, Tuning, and Testing Counts

| Procedure | Pre-SMOTE Training | Post-SMOTE Training | Tuning Testing |       |
|-----------|--------------------|---------------------|----------------|-------|
| TTB       | 6,023              | 3,864               | 3,011          | 3,012 |
| TIPS      | 1,131              | 2,750               | 566            | 566   |
| UAE       | 413                | 2,124               | 207            | 206   |

Note—Number of patients in each of the randomly partitioned subsets. The pre-SMOTE training set is provided as input to the SMOTE algorithm. The post-SMOTE training set is used to train the random forest models. The tuning set is used to hand-tune the hyperparameters. The testing set is used to evaluate the performance of the models.  
SMOTE = Synthetic Minority Oversampling Technique; TIPS = transjugular intrahepatic portosystemic shunt; TTB = trans-thoracic biopsy; UAE = uterine artery embolization.
